# Supplementary material for: Effects of Leisure‐Time and Transport‐Related Physical Activities on the Risk of Incident and Recurrent Myocardial Infarction and Interaction With Traffic‐Related Air Pollution: A Cohort Study
Source: PubMed Central journal article supplement — J Am Heart Assoc. 2018 Jul 18;7(15):e009554. doi: 10.1161/JAHA.118.009554 (PMC6201474; doi:10.1161/jaha.118.009554), 2018-07-18
Supplement: JAH3-7-e009554-s001.pdf [file JAH3-7-e009554-s001.pdf]

# **SUPPLEMENTAL MATERIAL**

**Table S1. Association between annual mean level of NO<sub>2</sub> at cohort baseline, physical activities (yes/no), and myocardial infarction, in a mutually adjusted model.**

|                                                                                              | <b>Crude* model</b> | <b>Fully adjusted† model</b> |
|----------------------------------------------------------------------------------------------|---------------------|------------------------------|
|                                                                                              | HR (95% CI)         | HR (95% CI)                  |
| <i>Incident MI (n =2,936) in 50,635 participants without a history of MI before baseline</i> |                     |                              |
| NO <sub>2</sub>                                                                              | 1.09 (1.04-1.15)    | 1.08 (1.03-1.14)             |
| Sports                                                                                       | 0.68 (0.63-0.73)    | 0.86 (0.79-0.93)             |
| Cycling                                                                                      | 0.83 (0.77-0.90)    | 0.90 (0.84-0.98)             |
| Walking                                                                                      | 0.83 (0.73-0.95)    | 0.94 (0.82-1.07)             |
| Gardening                                                                                    | 0.97 (0.90-1.06)    | 0.89 (0.82-0.98)             |
| Outdoor PAs‡                                                                                 | 0.66 (0.50-0.88)    | 0.77 (0.58-1.03)             |
| <i>Recurrent MI (n =324) in 1,233 participants with a history of MI before baseline</i>      |                     |                              |
| NO <sub>2</sub>                                                                              | 1.14 (0.97-1.34)    | 1.18 (1.00-1.39)             |
| Sports                                                                                       | 0.98 (0.78-1.23)    | 1.06 (0.84-1.35)             |
| Cycling                                                                                      | 0.78 (0.62-0.98)    | 0.79 (0.62-1.00)             |
| Walking                                                                                      | 0.77 (0.55-1.09)    | 0.80 (0.56-1.14)             |
| Gardening                                                                                    | 1.03 (0.81-1.32)    | 0.96 (0.75-1.25)             |
| Outdoor PAs‡                                                                                 | 0.50 (0.29-0.88)    | 0.52 (0.30-0.91)             |

NO<sub>2</sub> – Nitrogen Dioxide; MI – Myocardial infarction; HR - hazard ratio; CI - Confidence Interval

\* Adjusted mutually for other three physical activities and residential annual mean NO<sub>2</sub> exposure.

† Assessed in a separate model; Adjusted for sex, smoking (status, intensity, years smoked) , environmental tobacco smoke, education, physical activities at work, diet (fruit, vegetable, fat, and fish intake), alcohol consumption, marital status, and mutually for other three physical activities, and residential annual mean NO<sub>2</sub> exposure.

‡ Combined time spent cycling, walking, and gardening; adjusted for sex, smoking (status, intensity, years smoked) , environmental tobacco smoke, occupational smoke, education, physical activities at work, diet (fruit, vegetable, fat, and fish intake), alcohol consumption, marital status.

**Table S2. Association between participation (yes/no) in physical activities and myocardial infarction.**

|                                                                                                     | <b>Crude*</b><br>model | <b>Fully Adjusted†</b><br>model | <b>Fully Adjusted†</b><br>model<br>Additional<br>adjustment for BMI‡ | <b>Fully Adjusted†</b><br>model<br>Additional adjustment<br>for<br>BMI & Co-morbidities§ | <b>Fully Adjusted†</b><br>model<br>Without adjustment<br>for Education | <b>Fully<br/>Adjusted†<br/>model<br/>Females</b> | <b>Fully<br/>Adjusted†<br/>model<br/>Males</b> |
|-----------------------------------------------------------------------------------------------------|------------------------|---------------------------------|----------------------------------------------------------------------|------------------------------------------------------------------------------------------|------------------------------------------------------------------------|--------------------------------------------------|------------------------------------------------|
|                                                                                                     | HR (95% CI)            | HR (95% CI)                     | HR (95% CI)                                                          | HR (95% CI)                                                                              | HR (95% CI)                                                            | HR (95% CI)                                      | HR (95% CI)                                    |
| <b><i>Incident MI (n =2,936) in 50,635 participants without a history of MI before baseline</i></b> |                        |                                 |                                                                      |                                                                                          |                                                                        |                                                  |                                                |
| <b>Sports</b>                                                                                       | 0.67 (0.63-0.73)       | 0.85 (0.79-0.92)                | 0.89 (0.82-0.96)                                                     | 0.92 (0.85-0.99)                                                                         | 0.84 (0.78-0.91)                                                       | 0.83 (0.72-0.95)                                 | 0.87 (0.79-0.96)                               |
| <b>Cycling</b>                                                                                      | 0.84 (0.78-0.91)       | 0.91 (0.84-0.98)                | 0.93 (0.86-1.00)                                                     | 0.94 (0.87-1.02)                                                                         | 0.91 (0.84-0.98)                                                       | 0.88 (0.76-1.01)                                 | 0.92 (0.84-1.01)                               |
| <b>Walking</b>                                                                                      | 0.84 (0.74-0.96)       | 0.95 (0.83-1.08)                | 0.96 (0.84-1.09)                                                     | 0.95 (0.83-1.08)                                                                         | 0.94 (0.82-1.07)                                                       | 0.87 (0.68-1.12)                                 | 0.97 (0.83-1.13)                               |
| <b>Gardening</b>                                                                                    | 0.94 (0.87-1.02)       | 0.87 (0.80-0.95)                | 0.89 (0.82-0.97)                                                     | 0.91 (0.83-0.99)                                                                         | 0.86 (0.79-0.94)                                                       | 0.98 (0.85-1.12)                                 | 0.83 (0.75-0.93)                               |
| <b><i>Recurrent MI (n =324) in 1,233 participants with a history of MI before baseline</i></b>      |                        |                                 |                                                                      |                                                                                          |                                                                        |                                                  |                                                |
| <b>Sports</b>                                                                                       | 0.97 (0.77-1.22)       | 1.06 (0.83-1.35)                | 1.07 (0.84-1.36)                                                     | 1.06 (0.84-1.35)                                                                         | 1.05 (0.83-1.33)                                                       | 1.68 (0.96-2.91)                                 | 1.00 (0.76-1.31)                               |
| <b>Cycling</b>                                                                                      | 0.79 (0.63-0.99)       | 0.80 (0.63-1.01)                | 0.79 (0.63-1.00)                                                     | 0.80 (0.63-1.01)                                                                         | 0.80 (0.63-1.01)                                                       | 0.47 (0.27-0.82)                                 | 0.92 (0.71-1.21)                               |
| <b>Walking</b>                                                                                      | 0.78 (0.55-1.10)       | 0.82 (0.57-1.16)                | 0.85 (0.60-1.20)                                                     | 0.85 (0.60-1.21)                                                                         | 0.81 (0.57-1.15)                                                       | 0.55 (0.25-1.22)                                 | 0.84 (0.56-1.26)                               |
| <b>Gardening</b>                                                                                    | 0.98 (0.78-1.25)       | 0.91(0.71-1.18)                 | 0.91 (0.71-1.17)                                                     | 0.92 (0.71-1.19)                                                                         | 0.90 (0.70-1.16)                                                       | 0.90 (0.51-1.59)                                 | 0.91 (0.68-1.22)                               |

MI – Myocardial infarction; HR - hazard ratio; CI - confidence interval;

\* Adjusted mutually for the other physical activities;

† Adjusted for sex, smoking (status, intensity, years smoked) , environmental tobacco smoke, education, physical activities at work, diet (fruit, vegetable, fat, and fish intake), alcohol consumption, marital status, and mutually for other three physical activities.

‡ Additional adjustment for BMI ("Underweight = <18.5 //Normal weight = 18.5–24.9 //Overweight = 25–29.9 //Obesity = BMI of 30 or greater")

§ Additional adjustment for BMI and self-reported co-morbidities (stroke, hypertension, high cholesterol, and diabetes mellitus type II)

**Table S3. Association of annual mean level of NO<sub>2</sub> at cohort baseline and myocardial infarction.**

|                                                                                       | <b>Crude model</b> | <b>Fully adjusted<sup>†</sup> model</b> |
|---------------------------------------------------------------------------------------|--------------------|-----------------------------------------|
|                                                                                       | HR (95% CI)        | HR (95% CI)                             |
| Incident MI (n =2,851) in 50,635 participants without a history of MI before baseline |                    |                                         |
| Low NO <sub>2</sub> ( < 14.3 µg/m <sup>3</sup> )                                      | 1.0                | 1.0                                     |
| Medium NO <sub>2</sub> ( 14.3-20.9 µg/m <sup>3</sup> )                                | 1.06 (0.97-1.16)   | 1.06 (0.97-1.17)                        |
| High NO <sub>2</sub> ( > 20.9 µg/m <sup>3</sup> )                                     | 1.19 (1.07-1.32)   | 1.17 (1.05-1.30)                        |
| Recurrent MI (n =324) in 1,233 participants with a history of MI before baseline      |                    |                                         |
| Low NO <sub>2</sub> ( < 14.3 µg/m <sup>3</sup> )                                      | 1.0                | 1.0                                     |
| Medium NO <sub>2</sub> (14.3-20.9 µg/m <sup>3</sup> )                                 | 1.11 (0.84-1.47)   | 1.16 (0.88-1.54)                        |
| High NO <sub>2</sub> (> 21.0 µg/m <sup>3</sup> )                                      | 1.29 (0.94-1.78)   | 1.39 (1.01-1.93)                        |

MI – Myocardial infarction; HR hazard ratio; CI confidence interval;

\*Adjusted for sex, smoking (status, intensity, years smoked), environmental tobacco smoke, occupational smoke, education, physical activities at work, diet (fruit, vegetable, fat, and fish intake), alcohol consumption, marital status, and for commute and leisure time physical activities.
